# Supplementary material for: Clinical utility of decarboxylation prothrombin combined with α-fetoprotein for diagnosing primary hepatocellular carcinoma
Source: PubMed Central journal article supplement (PMC6172421; doi:10.1042/bsr20180044), 2018-10-05
Supplement: bsr20180044_Supp1.pdf [file bsr20180044_Supp1.pdf]

## **Search Strategy**

**PubMed** (searched on August 10, 2017)

Year (from inception to 2017)

Step 1: "hepatocellular carcinoma"/ all subheading [MeSH] OR "liver cancer"/all subheadings [all fields] OR "liver tumor"/ all subheadings [all fields] OR "HCC" /all subheadings [all fields]

Step 2: "des- $\gamma$ -carboxy-prothrombin"/all subheadings [all fields] OR "protein induced by vitamin K absence"/all subheadings [all fields] OR "antagonist- II" /all subheadings [all fields] OR "DCP" /all subheadings [all fields] OR "AFP" /all subheadings [all fields] AND results from Step 1

Step 3: "diagnostic test"/all subheadings [all fields] OR "diagnostic ability"/ all subheadings [all fields] AND results from Step 2

**Web of Knowledge** (searched on August 10, 2017)

Year (from inception to 2017)

Step 1: "hepatocellular carcinoma"/ [Topic] OR "liver tumor,/ [Topic] OR "HCC,/ [Topic]

Step 2; " des- $\gamma$ -carboxy-prothrombin " / [Topic] OR "protein induced by vitamin K absence"/ [Topic] OR "antagonist- II" / [Topic] / "DCP" / [Topic] / "AFP" / [Topic] / AND results from Step 1

中文检索策略

中国知网数据库、万方数据库和维普数据库

(检索日期:2017年8月10日)

年限(建库至2017年)

步骤1:“原发性肝癌”/[主题词]AND“”

步骤2:在步骤1的基础上“异常凝血酶原”/[关键词]OR“去 $\gamma$ -羧基凝血酶原”/[关键词]

步骤3:在步骤2的基础上加上“DCP”OR“PIVKA-II”/[关键词]

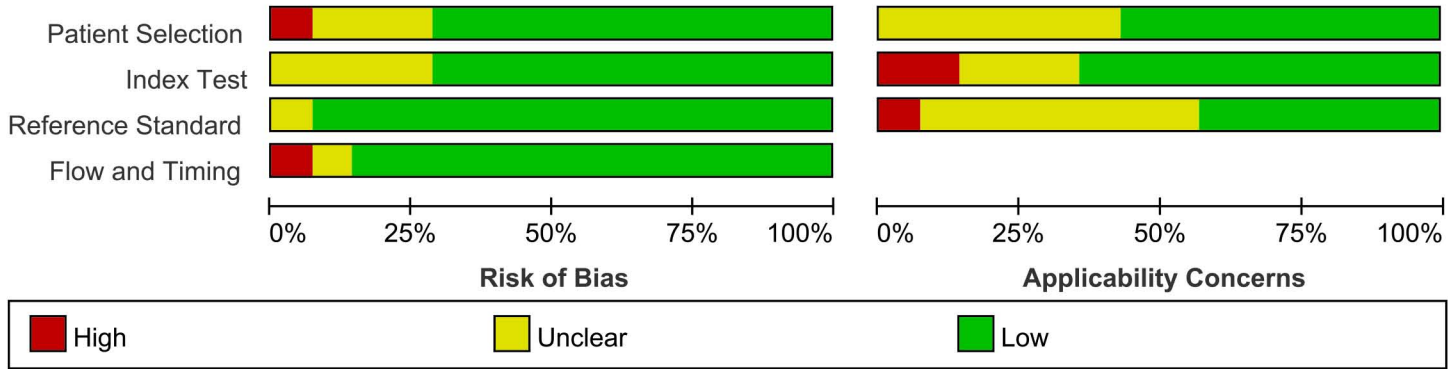

Risk of BiasApplicability Concerns

|            | <u>Risk of Bias</u> |            |                    |                 | <u>Applicability Concerns</u> |            |                    |
|------------|---------------------|------------|--------------------|-----------------|-------------------------------|------------|--------------------|
|            | Patient Selection   | Index Test | Reference Standard | Flow and Timing | Patient Selection             | Index Test | Reference Standard |
| Fu 2013    | ?                   | +          | +                  | +               | +                             | +          | +                  |
| Gao 2012   | +                   | +          | +                  | +               | +                             | +          | +                  |
| Huang 2016 | +                   | ?          | +                  | -               | +                             | +          | +                  |
| Huang 2016 | +                   | +          | +                  | +               | +                             | +          | +                  |
| Li 2013    | +                   | +          | +                  | +               | +                             | -          | +                  |
| Lin 2015   | +                   | +          | +                  | ?               | ?                             | ?          | +                  |
| Liu 2012   | -                   | ?          | +                  | +               | ?                             | +          | ?                  |
| Lu 2016    | +                   | +          | +                  | +               | +                             | +          | ?                  |
| Pu 2014    | +                   | ?          | +                  | +               | +                             | +          | ?                  |
| Shen 2016  | +                   | +          | +                  | +               | ?                             | ?          | ?                  |
| Song 2014  | ?                   | +          | +                  | +               | +                             | +          | ?                  |
| Yu 2016    | ?                   | +          | +                  | +               | ?                             | +          | ?                  |
| Zheng 2016 | +                   | ?          | +                  | +               | ?                             | ?          | ?                  |
| Zhu 2014   | +                   | +          | ?                  | +               | ?                             | -          | -                  |

High

Unclear

Low
